# Supplementary material for: Prognostic Significance of B-type Natriuretic Peptide in Patients with Left Ventricular Thrombus
Source: Research Square preprint supplement (doi:10.21203/rs.3.rs-152670/v1), 2021-01-26
Supplement: Supplementary file 1 [file f5a5b6b255d7ca34c44c444d.docx]

|  | [Univariate](https://cn.bing.com/dict/search?q=univariate&FORM=BDVSP6&mkt=zh-cn) | [Multivariate](https://cn.bing.com/dict/search?q=multivariate&FORM=BDVSP6&mkt=zh-cn) |  |  |  |
| --- | --- | --- | --- | --- | --- |
|  | P value | HR | Lower limit | Upper limit | P value |
| Age | 0.097 | - | - | - | - |
| WBC | 0.011 | - | - | - | - |
| PLT | 0.020 | - | - | - | - |
| ALB | 0.038 | - | - | - | - |
| BNP>median | 0.011 | 4.27 | 1.4 | 13.01 | 0.011 |

**Supplementary Data**

**Supplementary Table 1 Backward Conditional Cox** [**Univariate**](https://cn.bing.com/dict/search?q=univariate&FORM=BDVSP6&mkt=zh-cn) **and Multivariate Analysis for All-cause Mortality in CHD patients**

WBC: white blood cell count; PLT: platelet; ALB: albumin; BNP: brain natriuretic peptide; CHD: coronary heart disease;


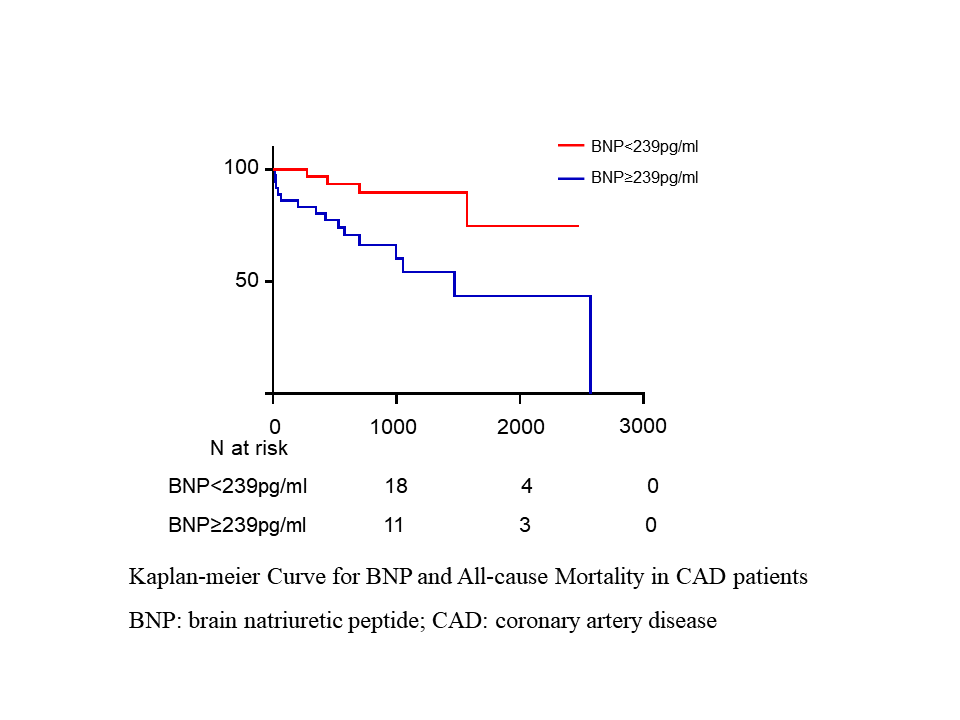


**Supplementary Figure 1.** Kaplan-meier Curve for BNP and All-cause Mortality in CHD patients.

BNP: brain natriuretic peptide; CHD: coronary heart disease
